# Supplementary material for: Shade effects on growth, photosynthesis and chlorophyll fluorescence parameters of three Paeonia species
Source: PeerJ. 2020 Jun 9;8:e9316. doi: 10.7717/peerj.9316 (PMC7292015; doi:10.7717/peerj.9316)
Supplement: Supplemental Information 1 [file peerj-08-9316-s003.xlsx]

## Sheet: Sheet1
Table 1. Enviroment factors in control group and under shade.
Time	PPFD (μmol·m-2·s-1)		Air temprature (°C)		CO2 concentration (μmol·mol-1)		relative humidity (%)
	Control	Shade	Control	Shade	Control	Shade	Control	Shade
07:00:00	876.283	245.359	19.9533	19.5615	435.211	434.057	39.8701	38.4516
08:00:00	1085.54	303.951	22.6049	22.7456	422.036	421.912	38.5159	38.2556
09:00:00	1251.32	350.369	24.4878	24.3518	419.517	417.985	37.2639	38.1569
10:00:00	1599.69	447.913	26.1657	25.7886	411.147	410.747	36.1201	37.0181
11:00:00	1669.2	467.375	27.8546	26.8524	400.892	400.847	30.9583	33.9858
12:00:00	1829.61	512.291	28.7512	27.5367	395.854	405.536	25.2847	29.8746
13:00:00	1868.68	523.23	29.151	28.1563	381.102	404.113	19.5208	22.1569
14:00:00	1698.15	475.483	28.0704	28.5354	383.244	398.211	12.0126	16.5837
15:00:00	1300.21	364.059	28.25	27.9886	387.536	393.12	13.5797	17.2548
16:00:00	1061.54	297.23	26.4404	26.9654	396.028	404.451	16.3965	19.6647
17:00:00	701.051	196.294	24.4253	25.3207	408.944	419.059	19.5312	22.1548
18:00:00	301.012	84.2832	23.8822	24.41	428.125	423.983	24.8964	26.3901
Table 2. L*, a* and b* color values of petal color of P. intermedia and P. veitchii.
Species	Treatment	L*		a*		b*
		Average	Standard deviation	Average	Standard deviation	Absolute value of average	Standard deviation
P. intermedia	Control	36.97	1.65	46.16	1.1	14.99	0.56
	Shade	36.83	0.87	46.33	0.91	15.59	0.63
P. veitchii	Control	45.21	1.57	34.4	1.98	20.46	1.31
	Shade	58.25	0.82	20.43	0.94	14	0.85
Table 3. Net photosynthetic rate (μmol·CO2·m-2·s-1) of three species and two cultivars from 7:00-18:00.
Time	P. anomala				P. intermedia				P. veitchii				DFG				QL
	Control		Shade		Control		Shade		Control		Shade		Control		Shade		Control		Shade
	Average	Standard deviation	Average	Standard deviation	Average	Standard deviation	Average	Standard deviation	Average	Standard deviation	Average	Standard deviation	Average	Standard deviation	Average	Standard deviation	Average	Standard deviation	Average	Standard deviation
07:00:00	6.5917	0.450342	3.6821	0.558124	4.48907	0.351324	3.31543	0.192922	5.79837	0.472702	2.55203	0.267912	6.05432	0.958323	2.02977	0.265617	3.81761	0.456551	1.66063	0.3868
08:00:00	9.8087	0.651787	4.83117	0.409537	6.54069	0.239493	3.7261	0.15931	7.14	0.314704	3.66523	0.701116	7.43811	0.63112	2.94943	0.316736	6.06229	0.540525	2.91081	0.5318
09:00:00	10.85	0.347812	7.5384	0.552919	8.15237	0.163359	5.51353	0.778354	11.8138	0.436709	5.88073	0.14401	9.60239	0.837033	4.5957	0.461712	9.67652	0.481523	3.31729	0.160826
10:00:00	11.1993	0.658432	8.0639	0.10131	11.1281	0.361904	6.97847	1.07043	12.2954	0.573689	6.95587	0.263025	11.6617	0.528744	5.92942	0.386523	11.7576	0.69944	4.7464	0.495222
11:00:00	8.21887	0.590584	9.0695	0.139055	6.69573	0.417281	7.11817	0.167518	7.71413	0.442181	8.38353	0.270273	7.04593	0.310618	6.70528	0.582577	7.13098	0.38903	5.12538	0.296646
12:00:00	4.9489	0.133584	6.6064	0.872584	5.03723	0.0794925	7.67785	0.182516	5.40417	0.573449	8.88043	0.119911	5.66687	0.429492	5.89193	0.500892	6.49337	0.515959	5.81008	0.151141
13:00:00	5.84537	0.592976	5.95187	0.5218	5.87883	0.26341	6.25853	0.451942	5.14093	0.181909	5.36617	0.799061	4.95862	0.821895	5.59251	0.434638	4.73413	0.302421	5.04096	0.869076
14:00:00	6.07993	0.100266	5.27	0.307601	6.01363	0.693783	4.39827	0.257161	5.12343	0.271794	5.27473	0.500742	2.61926	0.289983	4.39813	0.291771	5.08939	0.419828	3.56807	0.766497
15:00:00	7.0924	0.8922	4.7	0.529641	6.4629	1.02977	4.64797	0.353212	6.1952	0.338242	4.76223	0.388849	3.40087	0.313647	2.53261	0.0998327	3.9731	0.240685	2.42587	0.244025
16:00:00	4.8593	0.39726	4.13	0.133829	4.05703	0.0583401	3.4666	0.125842	5.1258	0.219415	3.7942	0.121761	3.08501	0.500026	2.45894	0.190048	3.74996	0.429451	2.02941	0.496753
17:00:00	4.33493	0.459794	3.24607	0.30726	3.44083	0.181052	3.4709	0.174368	4.16553	0.175081	3.5484	0.133062	2.8034	0.478447	2.29933	0.163112	3.04841	0.141119	1.57257	0.073933
18:00:00	3.65567	0.0940263	1.9521	0.105304	3.05757	0.0823532	1.63127	0.111141	3.0961	0.14117	3.12387	0.116654	1.30553	0.244005	0.560622	0.123227	2.15079	0.264837	1.28714	0.267193
Table 4. Pn (μmol·CO2·m-2·s-1) of three speceis and two cultivars under different levels of PAR (μmol·m-2·s-1) .
PAR	P. anomala				P. intermedia				P. veitchii				DFG				QL
	Control		Shade		Control		Shade		Control		Shade		Control		Shade		Control		Shade
	Average	Standard deviation	Average	Standard deviation	Average	Standard deviation	Average	Standard deviation	Average	Standard deviation	Average	Standard deviation	Average	Standard deviation	Average	Standard deviation	Average	Standard deviation	Average	Standard deviation
0	-1.7409	0.253958	-1.3726	0.460841	-1.2517	0.210055	-1.4037	0.204703	-1.7678	0.293688	-1.5335	0.228081	-2.8255	0.215491	-2.5272	0.0651772	-2.8255	0.235251	-2.624	0.266415
50	0.5897	0.0687983	1.2306	0.0626149	1.2822	0.355913	1.9244	0.199656	0.7673	0.43155	1.3625	0.435479	-0.717	0.210102	-0.4828	0.0243395	-0.717	0.261039	0.583	0.483202
100	2.422	0.196585	3.2239	0.310051	3.1301	0.533179	3.996	0.200173	2.6422	0.608616	3.2817	0.804577	1.0707	0.533279	1.274	0.0221866	1.0707	0.387366	2.9119	0.636113
150	3.8974	0.290131	4.7937	0.450437	4.5302	0.711611	5.4024	0.144938	4.0834	0.73268	4.6401	1.07192	2.6019	0.870544	2.792	0.05435	2.6019	0.481203	4.6696	0.744972
200	5.1081	0.346097	6.0575	0.522017	5.622	0.778979	6.4141	0.161243	5.2243	0.817944	5.6468	1.26998	3.9247	1.1868	4.1094	0.0849934	3.9247	0.540256	6.0349	0.825859
400	8.3244	0.386823	9.2915	0.540684	8.2624	1.63304	8.5954	0.489043	8.0952	0.967762	7.9089	1.70122	7.7573	2.159	7.9017	0.181854	7.7573	0.583758	9.306	1.01618
600	10.1338	0.618178	11.0051	0.44627	9.5499	1.532	9.5392	0.703021	9.6312	0.993426	8.9311	1.87181	10.1316	2.73463	10.126	0.245037	10.1316	0.524619	10.8667	1.12504
800	11.2523	0.21776	11.998	0.335392	10.2348	1.58205	10.0117	0.823749	10.5688	0.975484	9.4557	1.93546	11.6727	3.0449	11.3943	0.283718	11.6727	0.466722	11.6679	1.20831
1000	11.9804	0.511838	12.5925	0.222594	10.5992	1.56044	10.2551	0.889671	11.1869	0.941267	9.7311	1.94497	12.6932	3.1812	12.0368	0.304108	12.6932	0.435992	12.0659	1.2812
1200	12.4664	0.979084	12.9439	0.429609	10.7729	1.32578	10.3696	0.921682	11.6144	0.90475	9.8639	1.92326	13.3666	2.20094	12.2474	0.31085	13.3666	0.435259	12.2242	1.34927
1400	12.7921	0.383899	13.136	0.546709	10.8239	1.10757	10.4046	0.931588	11.919	0.875063	9.9074	1.88189	13.7971	2.1414	12.1472	0.307153	13.7971	0.461843	12.2286	1.41494
1600	13.0059	0.414061	13.2179	0.267464	10.7913	0.988846	10.387	0.926316	12.1399	0.85904	9.8915	1.82749	14.0509	2.02826	11.8161	0.295371	14.0509	0.512353	12.1281	1.47939
1800	13.1387	0.450757	13.2205	0.417385	10.6992	0.820856	10.3329	0.91029	12.301	0.8616	9.8339	1.76406	14.1723	1.88045	11.3087	0.277336	14.1723	0.584063	11.9531	1.54322
2000	13.2109	0.591099	13.1643	0.579834	10.5632	0.745442	10.2524	0.886413	12.4181	0.885454	9.746	1.69395	14.1917	1.71342	10.6636	0.254652	14.1917	0.674477	11.7231	1.60679
Table 5. AQY(μmol·mol-1), LSPn(μmol·CO2·m-2·s-1), LCP(μmol·mol-1) and LSP(μmol·mol-1) of three species and two cultivars under two kinds of light conditions.
Indicators	P. anomala				P. intermedia				P. veitchii				DFG				QL
	Control		Shade		Control		Shade		Control		Shade		Control		Shade		Control		Shade
	Average	Standard deviation	Average	Standard deviation	Average	Standard deviation	Average	Standard deviation	Average	Standard deviation	Average	Standard deviation	Average	Standard deviation	Average	Standard deviation	Average	Standard deviation	Average	Standard deviation
AQY	0.0530667	0.00696156	0.0605667	0.0134894	0.0598333	0.00146401	0.0733333	0.00644584	0.0598667	0.00873747	0.0725333	0.0142973	0.0633333	0.00664254	0.0441333	0.00092376	0.0462	0.00645058	0.0632333	0.00540123
LSPn	13.5343	1.07486	13.4126	0.547515	11.3266	0.256292	10.9427	0.19942	12.8714	0.874863	9.9272	1.46521	13.4799	2.31657	12.2502	0.310999	14.2251	0.625672	12.2437	1.00656
LCP	39.4921	2.62855	23.8924	5.18849	20.0661	10.2201	14.1148	1.84209	34.1906	10.6744	24.4592	5.64098	61.3377	7.29561	68.2828	0.625692	75.4871	8.63016	47.2105	9.63421
LSP	439.834	49.3644	390.441	48.7563	364.311	39.1684	304.699	5.83809	404.001	46.9668	305.889	8.3184	404.367	57.2378	435.78	6.33176	495.085	26.4244	368.886	15.1008
Rd	1.74297	0.253958	1.2804	0.290662	1.2685	0.182736	1.2163	0.102641	1.6513	0.440935	1.40023	0.214897	2.8948	0.215491	2.52723	0.0651772	2.63153	0.381147	2.806	0.313868
Table 6. Chlorophyll content(mg·g-1) of three species and two cultivars.
Species	Control						Shade
	Chl a		Chl b		Chl a/b		Chl a		Chl b		Chl a/b
	Average	Standard deviation	Average	Standard deviation	Average	Standard deviation	Average	Standard deviation	Average	Standard deviation	Average	Standard deviation
P. anomala	1.77839	0.0375811	0.531148	0.011292	3.34845	0.0487332	1.86026	0.0246825	0.523848	0.00380366	3.55133	0.0580376
P. intermedia	1.38577	0.0289451	0.397353	0.0613967	3.53589	0.47527	1.64297	0.0153969	0.422748	0.0160267	3.88934	0.116632
P. veitchii	1.93048	0.0475533	0.628747	0.0589343	3.0831	0.204347	2.09213	0.123305	0.69637	0.019506	3.00885	0.257553
P. lactilflora 'Da Fugui'	1.34826	0.114205	0.39929	0.061234	3.40183	0.247196	1.92678	0.0158946	0.594673	0.00401395	3.24006	0.016287
P. lactilflora 'Qiao Ling'	1.79275	0.0327082	0.520594	0.0219439	3.44929	0.201651	2.10623	0.0423024	0.634532	0.0483487	3.32919	0.199133
Table 7. Chlorophyll fluorescence parameters of three species and two cultivars under two kinds of light conditions.
Species	Treatment		F	Fo'	Fm'	Fo	Fm	Fv/Fm	Fv'/Fm'	Fv/Fo	NPQ	qP	ETR	ΦD	ΦPSII	ΦNPQ
P. anomala	Control		0.283	0.264	0.875	0.265	1.011	0.737883	0.698286	2.81509	0.155429	0.968903	58.537	0.301714	0.676571	0.0217143
			0.291	0.263	0.901	0.277	1.046	0.735182	0.708102	2.77617	0.160932	0.956113	58.5762	0.291898	0.677026	0.0310766
			0.327	0.289	1.025	0.285	1.203	0.763092	0.718049	3.22105	0.173659	0.94837	58.918	0.281951	0.680976	0.0370732
		Average		0.272	0.933667	0.275667	1.08667	0.745386	0.708146	2.93744	0.16334	0.957795	58.6771	0.291854	0.678258	0.0298871
		Sd		0.0147309	0.0801582	0.0100664	0.102256	0.0153937	0.0098816	0.246385	0.0093504	0.0103698	0.20958	0.0098816	0.00242233	0.00774066
	Shade		0.35	0.299	1.154	0.285	1.393	0.795406	0.740901	3.88772	0.207106	0.940351	60.2791	0.259099	0.696707	0.0441941
			0.364	0.306	1.202	0.284	1.399	0.796998	0.745424	3.92606	0.163894	0.935268	60.3193	0.254576	0.697171	0.0482529
			0.369	0.306	1.189	0.297	1.418	0.79055	0.742641	3.77441	0.192599	0.928652	59.669	0.257359	0.689655	0.0529857
		Average		0.303667	1.18167	0.288667	1.40333	0.794318	0.742989	3.86273	0.187866	0.934757	60.0891	0.257011	0.694514	0.0484748
		Sd		0.00404145	0.0248261	0.00723418	0.0130512	0.0033587	0.00228152	0.078851	0.0219914	0.00586598	0.36441	0.00228152	0.00421186	0.0044001
P. intermedia	Control		0.348	0.307	0.936	0.344	1.072	0.679104	0.672009	2.11628	0.145299	0.934817	54.3523	0.327991	0.628205	0.0438034
			0.286	0.253	0.767	0.336	0.965	0.651813	0.670143	1.87202	0.258149	0.935798	54.2583	0.329857	0.627119	0.0430248
			0.3	0.27	0.794	0.285	0.96	0.703125	0.65995	2.36842	0.209068	0.942748	53.8298	0.34005	0.622166	0.0377834
		Average		0.276667	0.832333	0.321667	0.999	0.678014	0.667367	2.11891	0.204172	0.937788	54.1468	0.332633	0.625849	0.0415185
		Sd		0.0276104	0.0907873	0.0320052	0.0632693	0.0256731	0.00649115	0.248209	0.0565838	0.00432376	0.278515	0.00649115	0.00321908	0.00327413
	Shade		0.484	0.366	1.424	0.3	1.651	0.818292	0.742978	4.50333	0.15941	0.888469	57.1129	0.257022	0.660112	0.0828652
			0.487	0.385	1.443	0.34	1.608	0.788557	0.733195	3.72941	0.114345	0.903592	57.3202	0.266805	0.662509	0.0706861
			0.422	0.329	0.872	0.325	1.602	0.797129	0.622706	3.92923	0.837156	0.828729	44.6491	0.377294	0.516055	0.106651
		Average		0.36	1.24633	0.321667	1.62033	0.801326	0.699626	4.05399	0.370304	0.873597	53.0274	0.300374	0.611191	0.0884351
		Sd		0.0284781	0.324321	0.0202073	0.026727	0.0153053	0.0667938	0.401762	0.404933	0.0395851	7.25659	0.0667938	0.0838718	0.0182922
P. veitchii	Control		0.345	0.307	0.938	0.29	1.183	0.754861	0.672708	3.07931	0.261194	0.939778	54.6976	0.327292	0.632196	0.0405117
			0.324	0.285	0.951	0.268	1.154	0.767764	0.700315	3.30597	0.21346	0.941441	57.0432	0.299685	0.659306	0.0410095
			0.41	0.335	1.061	0.324	1.342	0.758569	0.68426	3.14198	0.264844	0.896694	53.0863	0.31574	0.613572	0.070688
		Average		0.309	0.983333	0.294	1.22633	0.760398	0.685761	3.17575	0.246499	0.925971	54.9423	0.314239	0.634995	0.050766
		Sd		0.0250599	0.0675747	0.0282135	0.101214	0.00664342	0.0138649	0.117044	0.0286715	0.0253683	1.98977	0.0138649	0.0229978	0.0172804
	Shade		0.505	0.355	1.297	0.27	1.688	0.840047	0.726291	5.25185	0.301465	0.840764	52.8326	0.273709	0.61064	0.115652
			0.426	0.335	1.181	0.26	1.638	0.84127	0.716342	5.3	0.38696	0.892435	55.3113	0.283658	0.639289	0.0770533
			0.475	0.383	1.21	0.3	1.704	0.823944	0.683471	4.68	0.408264	0.888755	52.5555	0.316529	0.607438	0.0760331
		Average		0.357667	1.22933	0.276667	1.67667	0.835087	0.708702	5.07728	0.365563	0.873985	53.5665	0.291298	0.619394	0.0893073
		Sd		0.0241109	0.0603683	0.0208167	0.0344287	0.00966972	0.0224094	0.344899	0.0565235	0.0288284	1.51738	0.0224094	0.0175379	0.022585
DFG	Control		0.177	0.163	0.374	0.136	0.492	0.723577	0.564171	2.61765	0.315508	0.933649	45.5734	0.435829	0.526738	0.0374332
			0.131	0.13	0.382	0.131	0.489	0.732106	0.659686	2.73282	0.280105	0.996032	56.8495	0.340314	0.657068	0.0026178
			0.145	0.14	0.431	0.134	0.491	0.727088	0.675174	2.66418	0.139211	0.982818	57.4123	0.324826	0.663573	0.0116009
		Average		0.144333	0.395667	0.133667	0.490667	0.72759	0.63301	2.67155	0.244941	0.970833	53.2784	0.36699	0.614547	0.018463
		Sd		0.0169214	0.0308599	0.00251661	0.00152753	0.00428673	0.0601174	0.0579414	0.0932604	0.0328728	6.6787	0.0601174	0.0771925	0.0180744
	Shade		0.155	0.147	0.51	0.131	0.597	0.78057	0.711765	3.55725	0.170588	0.977961	60.2247	0.288235	0.696078	0.0156863
			0.169	0.155	0.491	0.146	0.613	0.761827	0.684318	3.19863	0.248473	0.958333	56.7402	0.315682	0.655804	0.0285132
			0.177	0.163	0.455	0.149	0.613	0.756933	0.641758	3.11409	0.347253	0.952055	52.8628	0.358242	0.610989	0.0307692
		Average		0.155	0.485333	0.142	0.607667	0.766443	0.67928	3.28999	0.255438	0.962783	56.6092	0.32072	0.654	0.0252806
		Sd		0.008	0.0279344	0.00964365	0.0092376	0.012476	0.035274	0.235282	0.088538	0.0135144	3.68272	0.035274	0.0425649	0.00813548
QL	Control		0.181	0.172	0.534	0.163	0.662	0.753776	0.677903	3.06135	0.2397	0.975138	57.1939	0.322097	0.661049	0.0168539
			0.188	0.175	0.521	0.168	0.635	0.735433	0.664107	2.77976	0.21881	0.962428	55.2997	0.335893	0.639155	0.024952
			0.171	0.16	0.407	0.17	0.658	0.741641	0.60688	2.87059	0.616708	0.955466	50.1688	0.39312	0.579853	0.027027
		Average		0.169	0.487333	0.167	0.651667	0.743617	0.64963	2.9039	0.358406	0.964344	54.2208	0.35037	0.626467	0.0231633
		Sd		0.00793725	0.0698737	0.00360555	0.0145717	0.0093299	0.0376599	0.143719	0.223939	0.00997525	3.63469	0.0376599	0.0420098	0.00537551
	Shade		0.182	0.149	0.498	0.151	0.611	0.752864	0.700803	3.04636	0.226908	0.905444	54.9002	0.299197	0.634538	0.0662651
			0.207	0.181	0.562	0.173	0.701	0.75321	0.677936	3.05202	0.247331	0.931759	54.6523	0.322064	0.631673	0.0462633
			0.234	0.189	0.52	0.196	0.763	0.743119	0.636538	2.89286	0.467308	0.864048	47.586	0.363462	0.55	0.0865385
		Average		0.173	0.526667	0.173333	0.691667	0.749731	0.671759	2.99708	0.313849	0.900417	52.3795	0.328241	0.604863	0.0668958
		Sd		0.021166	0.0325167	0.0225019	0.0764286	0.00572857	0.0325746	0.0903035	0.133291	0.0341339	4.15316	0.0325746	0.0480023	0.0201377
Table 8. Raw data for membership function calculation
Accessions	AQY	Fv/Fm	Fv/Fo	ΦPSII change	ETR	LSPn change	LCP	LSP	Rd
P. veitchii	1	1	1	0.277323	0.680413	0	0.880398	1	0.822003
	0.59009	0.986762	0.980017	0.305239	0.522233	0.277532	0.787009	0.915559	0.800854
	0.364865	0.822811	0.742429	0.326302	0.50455	0.543294	0.682132	0.890295	0.68792
DFG	0.036036	0.381874	0.276017	1	0.993963	0.903007	0.0202473	0.0858924	0.299474
	0	0.261711	0.126999	0.342712	0.771598	0.862917	0.0175834	0.0286642	0.293483
	0.018018	0.321792	0.201508	0.671356	0.882781	0.882962	0.0189153	0.0572783	0.296479
P. intermedia	0.835586	0.663951	0.669021	0.449846	0.808611	0.852763	1	0.98419	0.820649
	0.691441	0.529532	0.442981	0.457247	0.795382	0.857546	0.973266	0.957756	0.858311
	0.481982	0.46334	0.389057	0	0	0.848079	0.92194	0.88856	0.841121
QL	0.565315	0.102851	0.0660961	0.265115	0.654178	0.496295	0.576296	0.6106	0.296973
	0.439189	0.0997963	0.0637697	0.322827	0.638358	0.328603	0.313262	0.486647	0.267021
	0.322072	0	0	0.241989	0.187419	0.804155	0.259844	0.403335	0
P. anomala	0.731982	0.447047	0.42923	0.407106	1	1	0.872137	0.709873	1
	0.22973	0.430754	0.454821	0.413193	0.997435	0.978985	0.814008	0.302332	0.929104
	0.480856	0.4389	0.442026	0.41015	0.998717	0.989493	0.843072	0.506103	0.964552
Table 9. Raw data of daylength during experiment
Date	Daylength		Time	Air temprature (°C)		Relative humidity (%)		CO2 concentration		PPFD (μmol·CO2·m-2·s-1)
3.22	12:12:29			Control	Shade	Control	Shade	Control	Shade	Control	Shade
3.23	12:15:08		07:00:00	19.9533	19.5615	39.8701	38.4516	423.211	426.525	876.283	245.359
3.24	12:17:46		08:00:00	22.6049	22.7456	38.5159	38.2556	417.586	418.143	1085.54	303.951
3.25	12:20:24		09:00:00	24.4878	24.3518	37.2639	38.1569	411.441	408.812	1251.32	350.369
3.26	12:23:03		10:00:00	26.1657	25.7886	36.1201	37.0181	398.464	399.993	1599.69	447.913
3.27	12:25:40		11:00:00	27.8546	26.8524	30.9583	33.9858	393.634	395.154	1669.2	467.375
3.28	12:28:18		12:00:00	29.7547	27.5367	25.2847	29.8746	396.515	390.585	1829.61	512.291
3.29	12:30:56		13:00:00	30.6513	28.1563	19.5208	22.1569	396.363	385.516	1868.68	523.23
3.30	12:33:33		14:00:00	31.3938	28.5354	12.0126	16.5837	394.336	387.236	1698.15	475.483
3.31	12:36:10		15:00:00	29.236	27.9886	13.5797	17.2548	392.641	390.569	1300.21	364.059
4.1	12:38:47		16:00:00	26.4404	26.9654	16.3965	19.6647	404.244	402.369	1061.54	297.23
4.2	12:41:24		17:00:00	24.4253	25.3207	19.5312	22.1548	418.592	414.057	701.051	196.294
4.3	12:44:00		18:00:00	23.8822	24.41	24.8964	26.3901	420.325	422.516	301.012	84.2832
4.4	12:46:36
4.5	12:49:11
4.6	12:51:47
4.7	12:54:22
4.8	12:56:56
4.9	12:59:30
4.10	13:02:04
4.11	13:04:37
4.12	13:07:10
4.13	13:09:42
4.14	13:12:13
4.15	13:14:44
4.16	13:17:14
4.17	13:19:44
4.18	13:22:13
4.19	13:24:41
4.20	13:27:08
4.21	13:29:35
4.22	13:32:00
4.23	13:34:25
4.24	13:36:49
4.25	13:39:12
4.26	13:41:34
4.27	13:43:54
4.28	13:46:14
4.29	13:48:32
4.30	13:50:50
5.1	13:53:06
5.2	13:55:21
5.3	13:57:34
5.4	13:59:46
5.5	14:01:57
5.6	14:04:06
5.7	14:06:14
5.8	14:08:20
5.9	14:10:25
5.10	14:12:28
5.11	14:14:29
5.12	14:16:28
5.13	14:18:26
5.14	14:20:21
5.15	14:22:15
5.16	14:24:06
5.17	14:25:56
5.18	14:27:43
5.19	14:29:28
5.20	14:31:10
5.21	14:32:51
5.22	14:34:29
5.23	14:36:04
5.24	14:37:37
5.25	14:39:07
5.26	14:40:35
5.27	14:42:00
5.28	14:43:22
5.29	14:44:41
5.30	14:45:58
5.31	14:47:11
6.1	14:48:22
6.2	14:49:30
6.3	14:50:34
6.4	14:51:35
average (h)	13.6919
max (h)	14.8597
min (h)	12.2081
SD (h)	0.8025
