# Supplementary material for: Shade effects on growth, photosynthesis and chlorophyll fluorescence parameters of three Paeonia species
Source: PeerJ. 2020 Jun 9;8:e9316. doi: 10.7717/peerj.9316 (PMC7292015; doi:10.7717/peerj.9316)
Supplement: Table S1 [file peerj-08-9316-s001.xlsx]

## Sheet: Sheet1
TableS1. Correlation matrix of selected photosynthesis index and chlorophyll fluorescence parameters.
	Fv.Fm	AQY	Fv.Fo	ETR	LCP	LSP	LSPnchange	ΦPSII
AQY	0.62
Fv.Fo	0.99*	0.63
ETR	0.01	-0.51	-0.07
LCP	-0.7	-0.88*	-0.66	0.07
LSP	-0.68	-0.97*	-0.7	0.61	0.81
LSPn change	0.28	0.23	0.41	-0.56	0.16	-0.32
ΦPSII	0.01	-0.51	-0.07	1.00*	0.07	0.61	-0.56
Rd	-0.83	-0.67	-0.76	-0.21	0.92*	0.64	0.24	-0.21
