# Supplementary material for: Shade effects on growth, photosynthesis and chlorophyll fluorescence parameters of three Paeonia species
Source: PeerJ. 2020 Jun 9;8:e9316. doi: 10.7717/peerj.9316 (PMC7292015; doi:10.7717/peerj.9316)
Supplement: Table S2 [file peerj-08-9316-s002.xlsx]

## Sheet: Sheet1
Table S2-1. Stomatal conductance (Gs) of five accesions.
Time	P. anomala				P. intermedia				P. veitchii				DFG				QL
	Control		Shade		Control		Shade		Control		Shade		Control		Shade		Control		Shade
	Average	Standard deviation	Average	Standard deviation	Average	Standard deviation	Average	Standard deviation	Average	Standard deviation	Average	Standard deviation	Average	Standard deviation	Average	Standard deviation	Average	Standard deviation	Average	Standard deviation
07:00:00	0.0564333	0.00533791	0.0666	0.00400375	0.060235	0.00724434	0.0891667	0.00190875	0.0432033	0.00207196	0.0972	0.00675056	0.0219111	0.00148866	0.0229867	0.00115957	0.0190778	0.00144463	0.0119	0.00224054
08:00:00	0.100433	0.00168028	0.0912667	0.00592818	0.0803267	0.016074	0.0971833	0.00640722	0.0615067	0.00479918	0.1123	0.0110639	0.0262889	0.00178497	0.0327333	0.00224666	0.0295444	0.00112039	0.0185889	0.00157595
09:00:00	0.122167	0.00827063	0.139533	0.0196521	0.0947333	0.0103016	0.106033	0.00643843	0.0825333	0.00450148	0.1338	0.010591	0.0339222	0.00375625	0.0387778	0.00301694	0.0459111	0.00336394	0.0332444	0.000847218
10:00:00	0.142133	0.00756461	0.130733	0.0132915	0.135433	0.0142973	0.127533	0.00774102	0.0896	0.0181155	0.153533	0.00730365	0.0402333	0.00351355	0.0476111	0.00303827	0.0478333	0.00120416	0.0398889	0.00317153
11:00:00	0.0971	0.00782368	0.153033	0.00909414	0.06335	0.0086526	0.1404	0.00485077	0.1141	0.00554346	0.166367	0.00784368	0.0372333	0.00075	0.0529222	0.00496482	0.0348778	0.00287957	0.0375111	0.00529798
12:00:00	0.0584667	0.00253246	0.0747667	0.00309892	0.0499333	0.00090185	0.131033	0.00917406	0.0496333	0.00633114	0.0725	0.00360555	0.0314678	0.00100628	0.0487444	0.00560226	0.0341333	0.000989949	0.0369889	0.00326514
13:00:00	0.0670667	0.00341223	0.0722	0.0007	0.0727333	0.00322542	0.0783333	0.00415251	0.0536	0.00208806	0.0474833	0.00544572	0.0273222	0.00831186	0.0396667	0.000818535	0.0210556	0.00144491	0.0279222	0.000864259
14:00:00	0.0873	0.0135503	0.0566667	0.00397031	0.0546	0.00500899	0.0698667	0.0020502	0.0525667	0.00109697	0.0393333	0.0015308	0.0249889	0.00262462	0.0248	0.00161168	0.0239222	0.00214288	0.0343889	0.00212864
15:00:00	0.0751667	0.00343851	0.0607667	0.00190875	0.0727333	0.00322542	0.0580333	0.00314696	0.0479	0.00101489	0.0364	0.000264575	0.0254778	0.00114212	0.0152778	0.00180816	0.0219111	0.00153007	0.0237667	0.00129228
16:00:00	0.0480667	0.00303699	0.0558	0.00272213	0.0347633	0.00127477	0.0504333	0.00061101	0.0312333	0.000416333	0.0308333	0.00289367	0.0221333	0.00176635	0.0122333	0.000676387	0.0228222	0.00121838	0.023	0.00165605
17:00:00	0.0389	0.00462277	0.0399	0.00460326	0.0334333	0.00291433	0.0313	0.0062	0.0241833	0.00174598	0.0275833	0.00257989	0.0181111	0.00133926	0.0150889	0.00107987	0.0155222	0.000405518	0.0229333	0.00259904
18:00:00	0.0342333	0.00309892	0.0299	0.0106579	0.0302167	0.000846069	0.0223433	0.000915442	0.0231333	0.00144338	0.0257333	0.00100167	0.0144111	0.00152598	0.00834444	0.00107716	0.00711111	0.000837324	0.0104311	0.00216107
Table S2-2. Intercellular CO2 concentration (Ci) of five accesions.
Time	P. anomala				P. intermedia				P. veitchii				DFG				QL
	Control		Shade		Control		Shade		Control		Shade		Control		Shade		Control		Shade
	Average	Standard deviation	Average	Standard deviation	Average	Standard deviation	Average	Standard deviation	Average	Standard deviation	Average	Standard deviation	Average	Standard deviation	Average	Standard deviation	Average	Standard deviation	Average	Standard deviation
07:00:00	279.637	16.6311	350.446	22.2423	274.08	10.1846	333.343	18.5266	261.894	5.22112	334.109	18.1677	129.367	17.947	265.734	10.3819	131.448	12.5356	295.097	6.80331
08:00:00	236.062	7.28165	337.764	9.03997	242.68	15.9983	313.408	10.9049	174.1	36.814	322.011	19.1984	91.2574	8.10186	228.254	7.29442	76.6459	15.3001	243.92	9.93249
09:00:00	215.2	8.78404	259.46	7.02611	204.148	12.1502	269.6	20.8364	189.974	3.58909	267.952	14.643	81.5889	5.04292	197.05	9.42984	75.8409	5.5606	224.228	7.50263
10:00:00	188.848	1.69832	231.451	4.19789	190.724	11.318	225.813	26.0666	160.205	14.1145	220.807	4.86783	58.0558	18.7255	155.338	6.73283	43.2945	5.97189	188.665	25.9053
11:00:00	218.199	3.64354	197.541	6.39606	238.22	14.7409	199.836	10.8985	213.902	12.5826	192.793	9.54449	64.9627	11.3317	140.554	6.75384	65.9118	15.126	168.708	6.3827
12:00:00	255.028	6.58908	182.252	5.66957	230.964	17.4508	190.325	7.99996	185.008	8.6955	153.643	14.3818	79.9092	10.5635	147.401	13.8095	102.956	2.37859	119.513	8.29228
13:00:00	236.288	9.29848	212.464	7.92293	171.652	19.7116	191.728	14.8349	203.539	6.7496	195.494	9.12647	81.4814	13.2016	190.81	9.6713	52.8437	7.77709	183.83	30.4358
14:00:00	229.619	5.47074	240.436	1.98085	182.456	2.07259	251.225	3.15294	205.555	6.95266	224.27	7.03458	142.452	39.7043	182.25	13.5059	58.6715	8.16871	158.138	40.1194
15:00:00	224.348	12.2359	184.529	12.782	190.66	3.25346	231.497	8.60289	186.439	2.19603	233.275	21.6231	170.65	10.1221	155.442	39.5468	87.9985	23.4331	225.894	31.147
16:00:00	273.013	6.45093	275.039	5.45997	222.945	15.1405	268.392	2.48972	214.658	11.0294	270.54	18.9851	203.854	23.8406	110.821	12.1629	120.051	14.2498	227.036	10.8143
17:00:00	281.68	3.91301	284.679	6.10299	248.485	6.27654	277.394	5.32103	228.432	5.01437	292.989	4.50229	147.359	18.2033	149.367	22.2774	80.9794	15.7701	283.663	10.4978
18:00:00	288.124	3.82861	302.185	12.9137	271.629	7.86805	304.539	16.0316	258.476	12.3194	310.404	5.61295	262.483	39.3765	334.563	16.9392	150.177	18.2919	304.672	43.8283
Table S2-3. Transpiration rate (Tr) of five accesions.
Time	P. anomala				P. intermedia				P. veitchii				DFG				QL
	Control		Shade		Control		Shade		Control		Shade		Control		Shade		Control		Shade
	Average	Standard deviation	Average	Standard deviation	Average	Standard deviation	Average	Standard deviation	Average	Standard deviation	Average	Standard deviation	Average	Standard deviation	Average	Standard deviation	Average	Standard deviation	Average	Standard deviation
07:00:00	1.6847	0.114472	1.57467	0.19092	1.7406	0.0999971	1.31637	0.28061	1.95803	0.163127	1.41003	0.210085	0.488444	0.140977	0.3543	0.0446066	0.455044	0.0547948	0.199572	0.0723345
08:00:00	1.91383	0.0509308	2.08447	0.14807	2.21153	0.102357	1.84763	0.126172	2.07253	0.326831	1.8088	0.131484	0.663	0.0662922	0.606267	0.0121338	1.0162	0.104636	0.347	0.047562
09:00:00	2.16877	0.0920056	2.25237	0.0865953	2.30923	0.0882055	2.00923	0.177038	2.5953	0.369135	1.9267	0.092616	1.28204	0.045639	1.05273	0.0255244	1.49032	0.0946741	0.921844	0.135606
10:00:00	2.93033	0.164199	2.25317	0.0972116	2.44244	0.381258	2.4859	0.203535	2.6189	0.205859	2.13123	0.122901	1.83593	0.188523	1.31159	0.125384	1.73637	0.110167	1.21059	0.0721998
11:00:00	2.3879	0.394747	2.57657	0.110789	2.99643	0.0383294	2.9527	0.0715076	2.93693	0.097263	2.3559	0.164874	1.63883	0.116524	1.24167	0.0453331	1.84222	0.0247425	1.26589	0.0406786
12:00:00	3.11997	0.108324	2.99333	0.0909144	3.21117	0.0665898	3.1481	0.0731542	2.63753	0.112161	2.5736	0.292574	2.23482	0.156124	1.67068	0.0743443	2.31072	0.132403	1.99769	0.220842
13:00:00	2.79957	0.0461957	3.0751	0.284221	3.21117	0.0665898	2.83163	0.181633	2.91997	0.164294	2.5577	0.263266	1.99794	0.302691	1.54316	0.0656092	1.48416	0.099942	1.47018	0.0817434
14:00:00	3.56477	0.32354	2.94143	0.0301633	3.1232	0.106185	3.01293	0.108641	2.68923	0.599227	2.21003	0.148275	1.54631	0.0892112	1.24649	0.0751781	1.84227	0.0619389	1.7741	0.0301376
15:00:00	3.2876	0.142968	2.56623	0.244197	3.52703	0.161138	2.7089	0.122421	2.63077	0.266568	2.09913	0.172574	1.22877	0.0585979	0.660422	0.026335	1.49098	0.0141797	1.09773	0.111496
16:00:00	2.44037	0.0816352	2.10697	0.109175	1.86683	0.0535008	2.08167	0.104243	1.73697	0.0644843	1.66113	0.0647081	1.24247	0.0931276	0.610967	0.0341362	1.38914	0.138138	1.06592	0.0815639
17:00:00	1.74253	0.0793445	1.5856	0.0584177	1.6727	0.0524649	1.01057	0.0230018	1.5038	0.0161025	1.34003	0.0712787	0.865311	0.0834637	0.61087	0.0985599	0.746817	0.0398974	0.966764	0.106896
18:00:00	1.48827	0.220155	1.07143	0.11477	1.15927	0.161936	0.8494	0.0577065	1.36719	0.0516911	1.1515	0.152686	0.353018	0.0476166	0.196306	0.0238316	0.122189	0.050949	0.0602778	0.020364
